# Supplementary material
Source: PubMed Central journal article supplement (PMC5715751)
Supplement: pnas.1708628114.sapp.pdf [file pnas.1708628114.sapp.pdf]

**Supplementary Material**

**Insights into functions of the H channel of cytochrome *c* oxidase  
from atomistic molecular dynamics simulations**

**Vivek Sharma<sup>a,b</sup>, Pablo G. Jambrina<sup>c,d</sup>, Markus Kaukonen<sup>a</sup>, Edina Rosta<sup>e</sup>, Peter R.  
Rich<sup>f</sup>**

<sup>a</sup> Department of Physics, University of Helsinki, P. O. Box 64, FI-00014 Helsinki, Finland.

<sup>b</sup> Institute of Biotechnology, University of Helsinki, Finland

<sup>c</sup> Departamento de Química Física I, Facultad de Ciencias Químicas, Universidad  
Complutense de Madrid, 28040 Madrid, Spain

<sup>d</sup> Departamento de Química Física Aplicada, Facultad de Ciencias, Universidad Autónoma de  
Madrid, 28049 Madrid, Spain

<sup>e</sup> Department of Chemistry, King's College London, London SE1 1DB, United Kingdom

<sup>f</sup> Institute of Structural and Molecular Biology, University College London, London WC1E  
6BT, United Kingdom

Figure S1: Comparison between C1 and C2 simulations. Snapshots from C1-VI (brown) and C2-IV (green) are compared. When the  $C_\alpha$  of both subunits I (shown as cartoons) are aligned, an RMSD of 2.2 Å is obtained, which is reduced to 1.1 Å when the loops are not considered. Positions of H channel residues are shown as sticks and are very similar (RMSD of 1.2 Å, or 0.8 Å if only the backbone is considered).

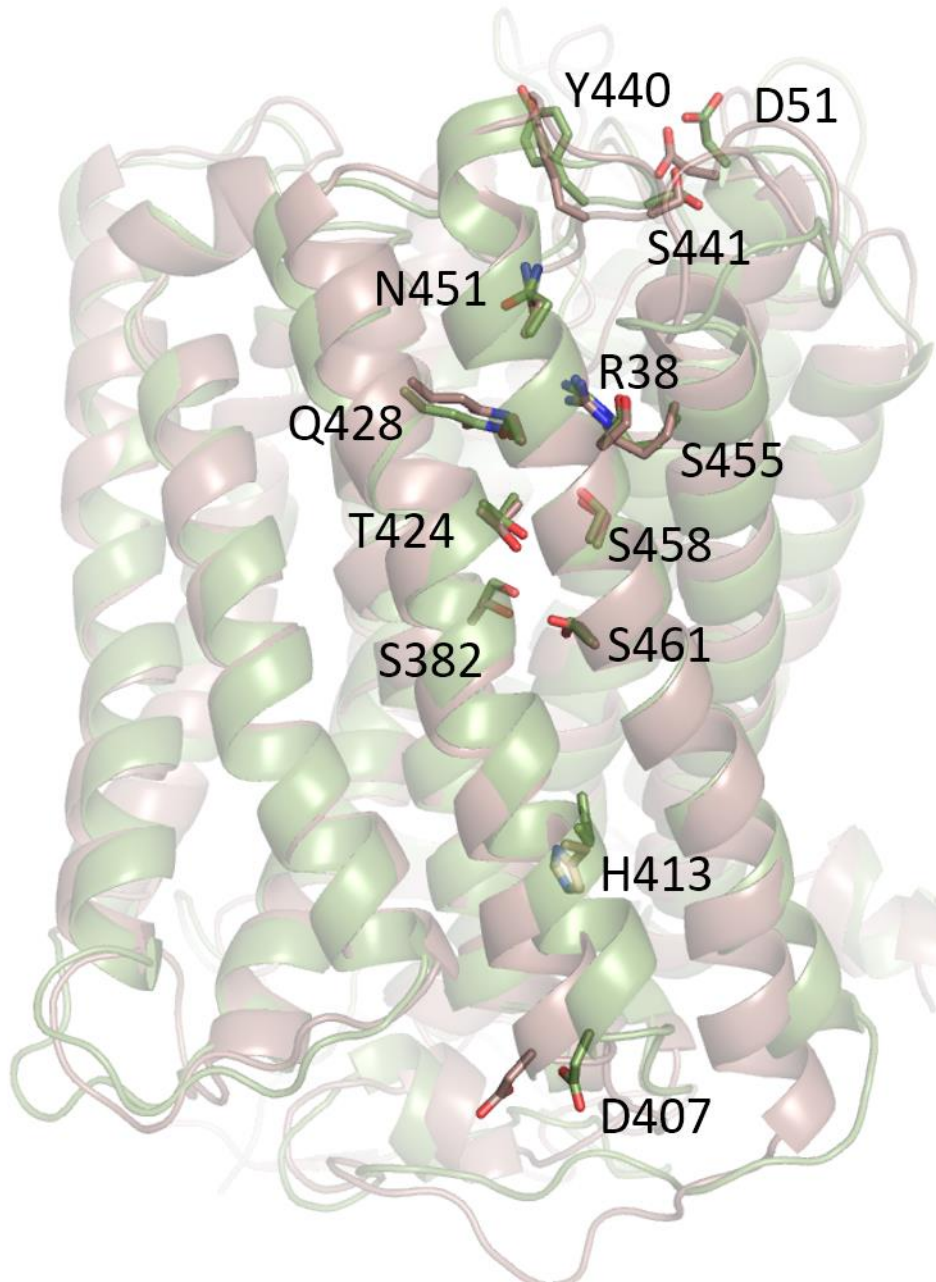

Figure S2: Predominantly hydrophobic environment around H413. Sidechains of the residues around H413 are shown as sticks and water molecules are shown as red spheres. Top panel: Crystal structure (PDB 1V54). Middle panel: After 300 ns (setup C1-I) with H413 in its neutral form. Lower panel: After 150 ns (setup C1-VI) with H413 in its cationic (+1) form. Protonation of H413 attracts water molecules to the H channel (see main text). The pocket occupied by H413 and the surrounding water molecules is shown as a surface.

### Crystal Structure (1V54):

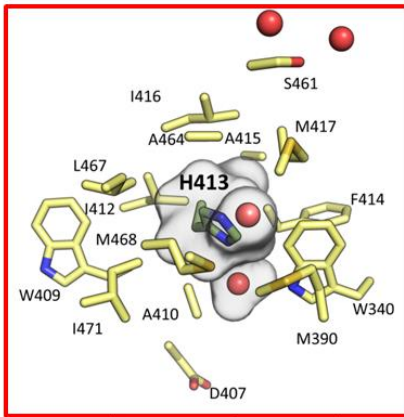

### C1-I (neutral H413):

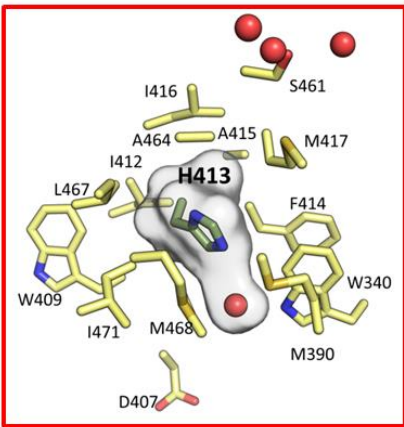

### C1-VI (cationic H413):

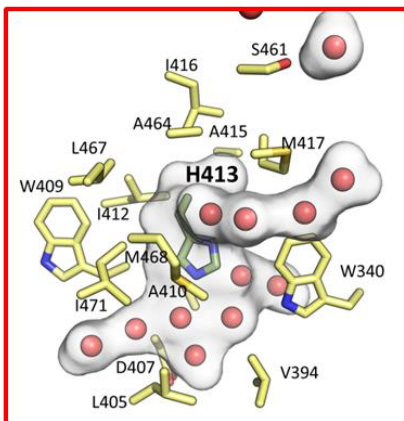

Figure S3. Number of water molecules (oxygen atoms) within 8 Å of His413 from simulations C3-II (five independent runs). All simulations started from a fully hydrated lower region of the H channel.

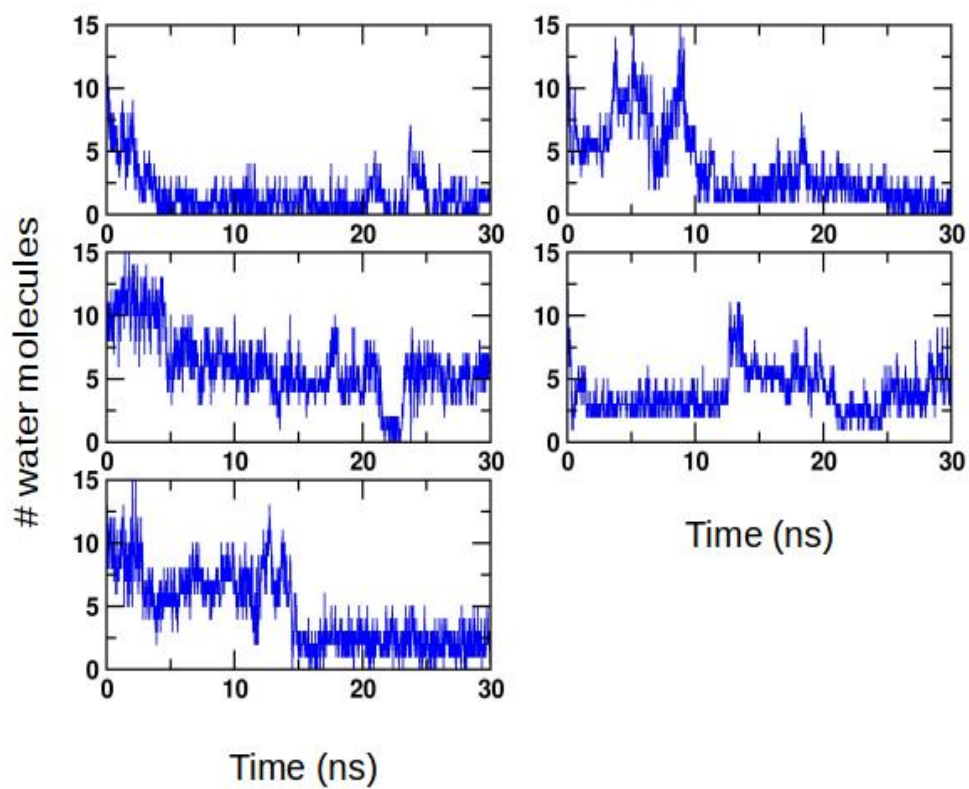

Figure S4. Number of water molecules (oxygen atoms) within 8 Å of His413 from simulations of C1-I (three independent runs). All simulations started from a fully hydrated lower region of the H channel. For clarity, plots display a running average of 20 snapshots.

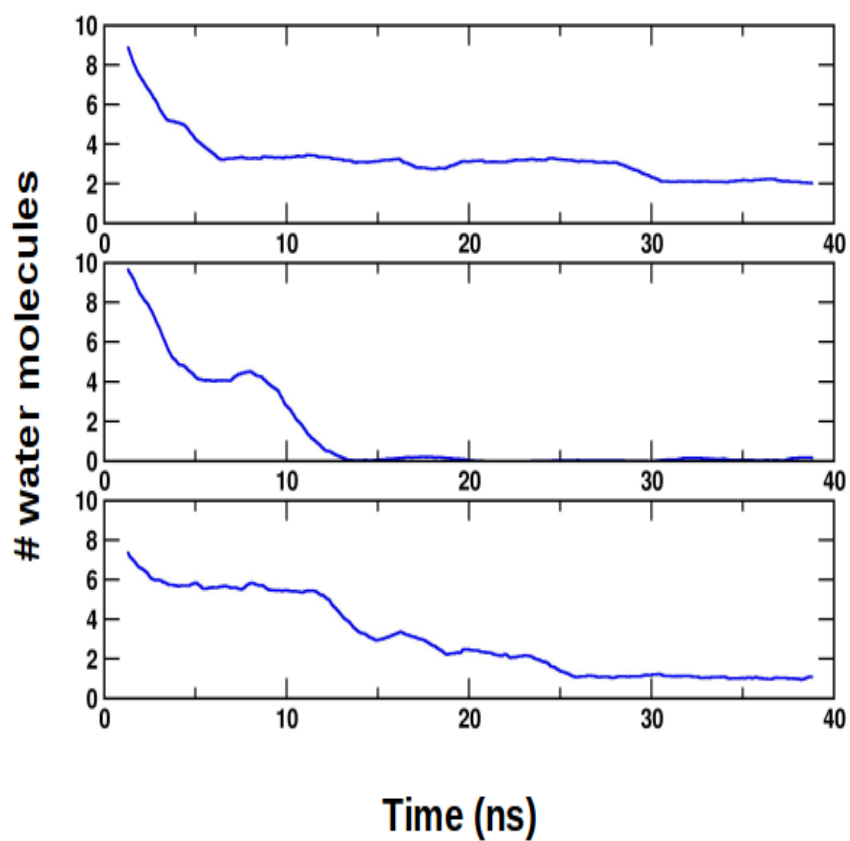

Figure S5. Free energy profiles for the hydration of lower region of H channel when His413 is neutral (top panel) or protonated (bottom panel). As reaction coordinate we have used  $\langle r_{\text{wat-H413}} \rangle$ , the average distance between the imidazole ring of His413 and the center-of-mass of the 10 water molecules closest to His413. The results for the protonated His413 (C1-VI simulations, red) show a single minimum at  $\langle r_{\text{wat-H413}} \rangle = 5.5 \text{ \AA}$ , representing a stable water wire. Deprotonation of His413 (C1-I, blue) changes the free energy landscape, and the water wire is no longer stable. Minima are found instead between  $\langle r_{\text{wat-H413}} \rangle = 9-11 \text{ \AA}$ , which are not compatible with a water wire connecting the bulk and the lower part of the H channel. Notice that the zero of the energy scale correspond to the most stable conformation for each of the systems.

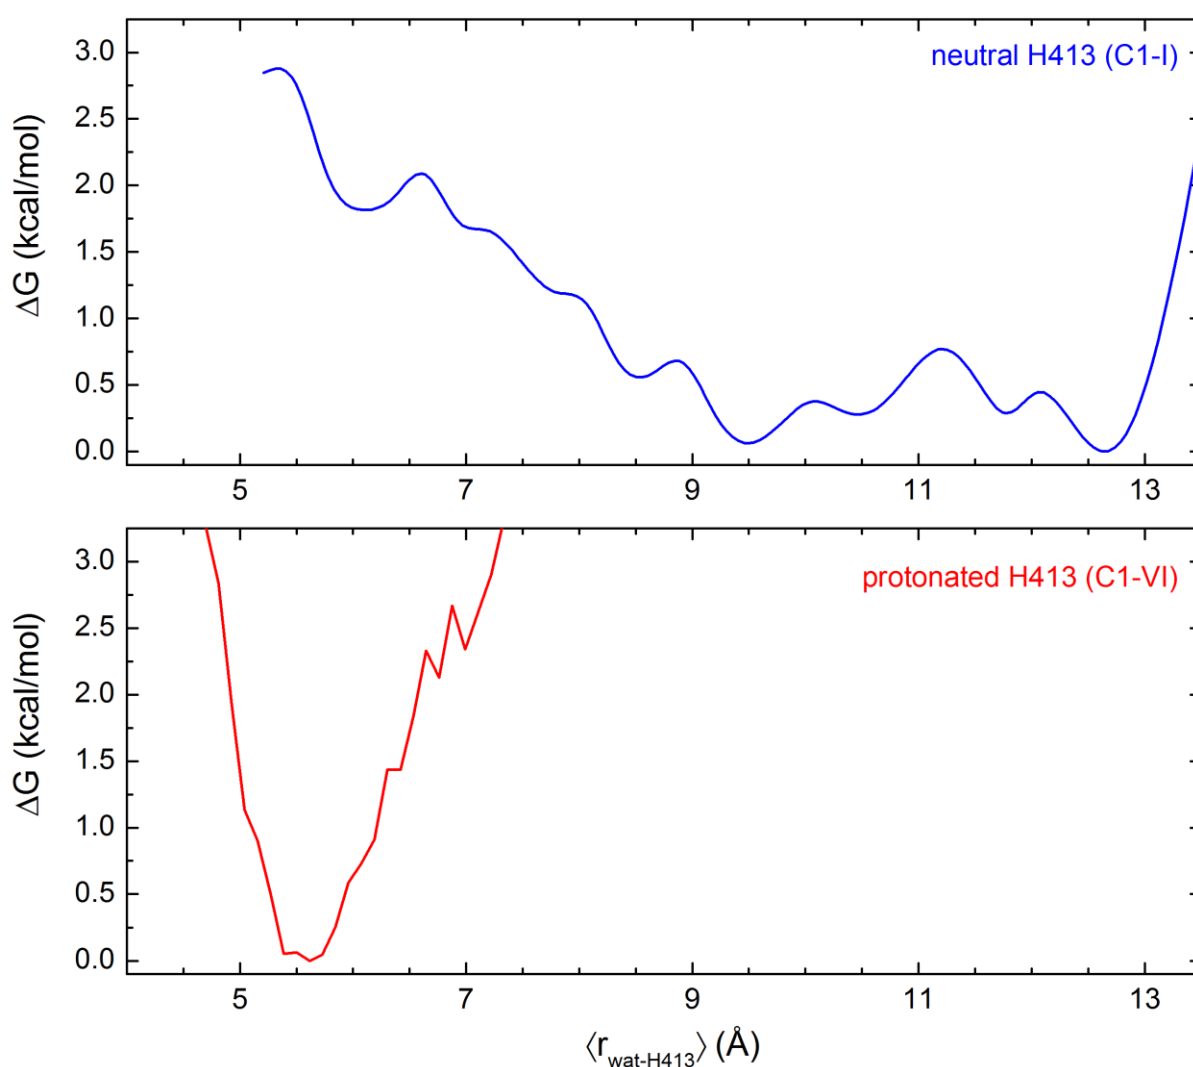

Figure S6: Snapshots at different time intervals display the fluctuation of electric dipole moment from simulations C2-I (red) and C2-II (blue). The amino acid side chains (yellow for C2-I, and brown for C2-II) are shown (see also Table 6 in main text). Backbone is displayed as white transparent ribbon, and low-spin heme is in licorice representation (green for C2-I and purple for C2-II).

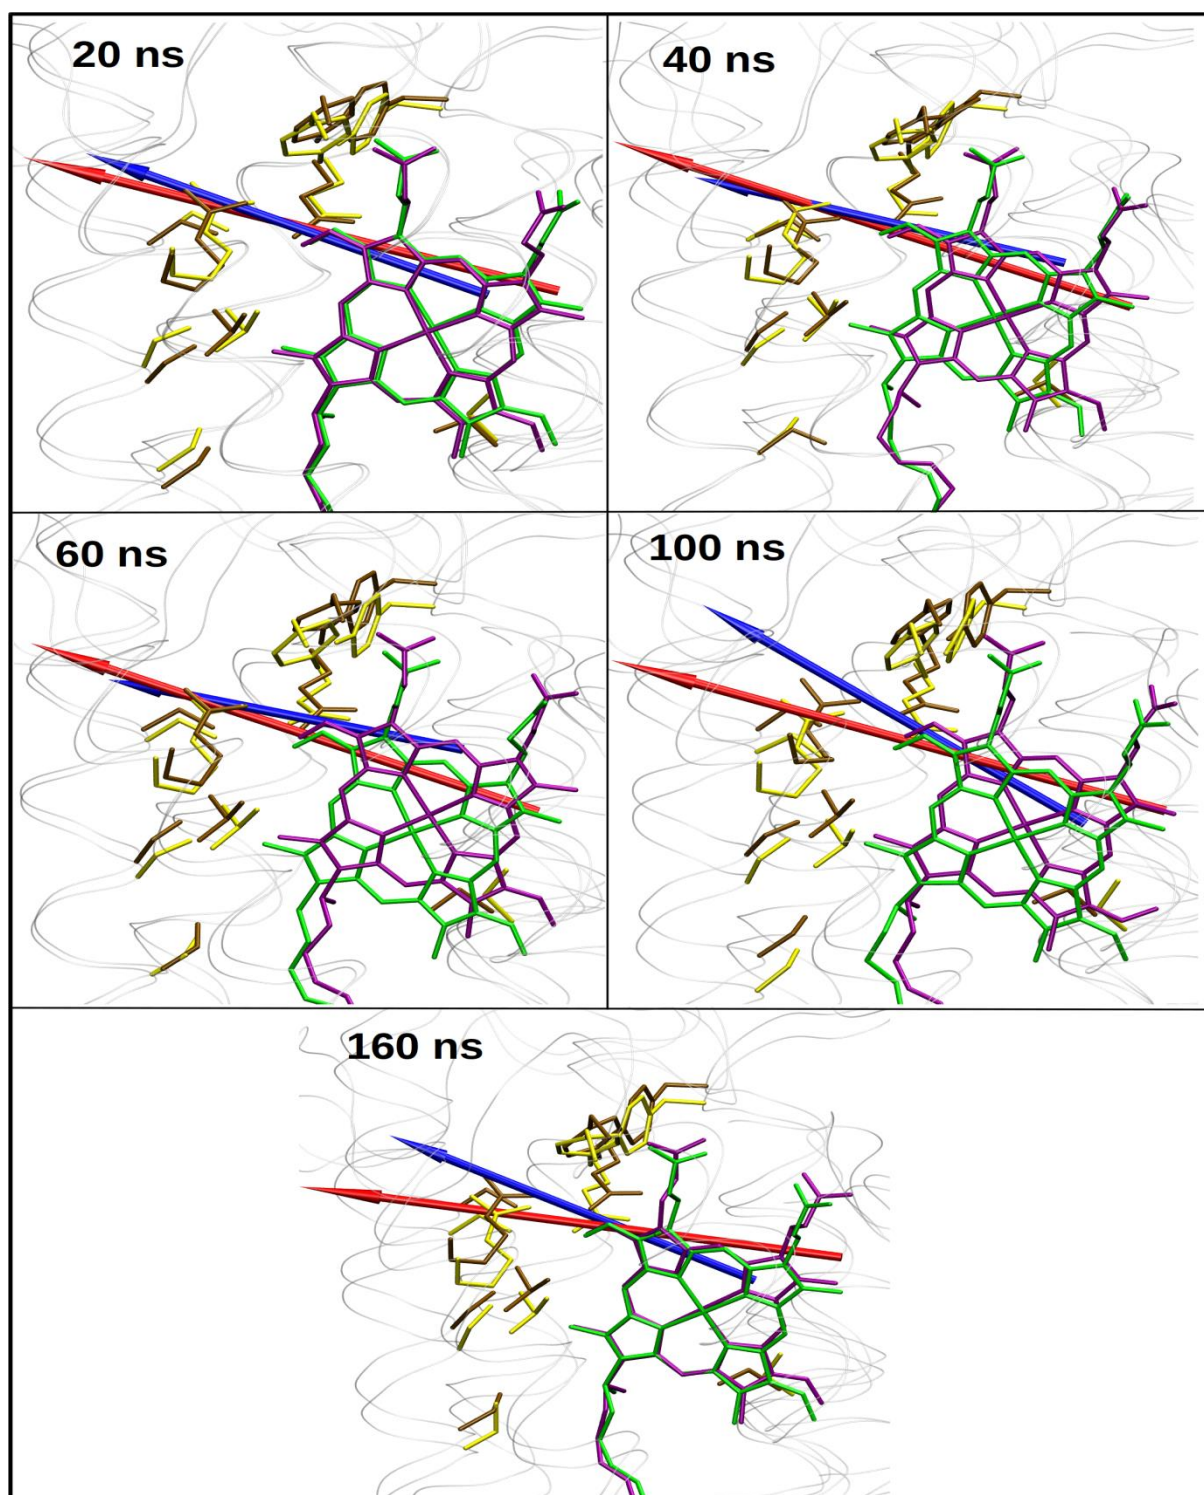

Figure S7: Root mean square deviation (RMSD) in Å vs simulation time (in ns) for C1 simulations. The structural alignment to zeroth simulation frame and RMSD calculations were performed using C $\alpha$  atoms.

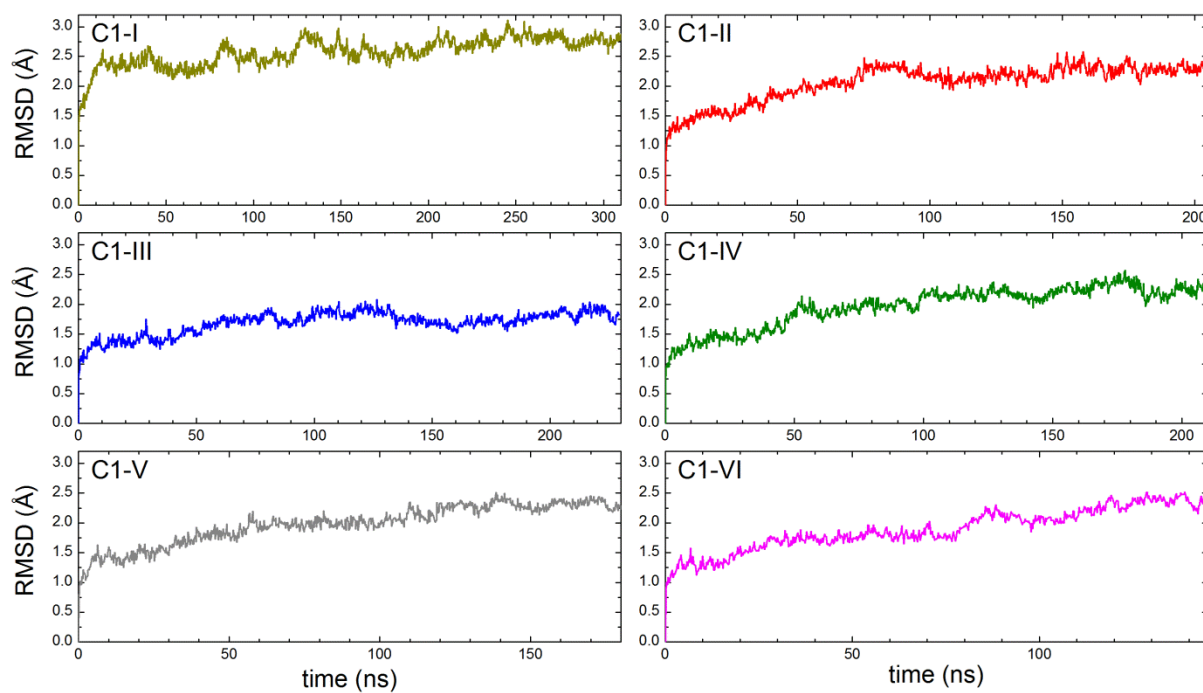



Figure S8: RMSD (in Å) vs simulation time (in ns) for C2 simulations. The structural alignment to zeroth simulation frame and RMSD calculation were performed using  $C\alpha$  atoms. Only the first replicas of setups C2 I, II, VII and VIII were used for RMSD calculations.

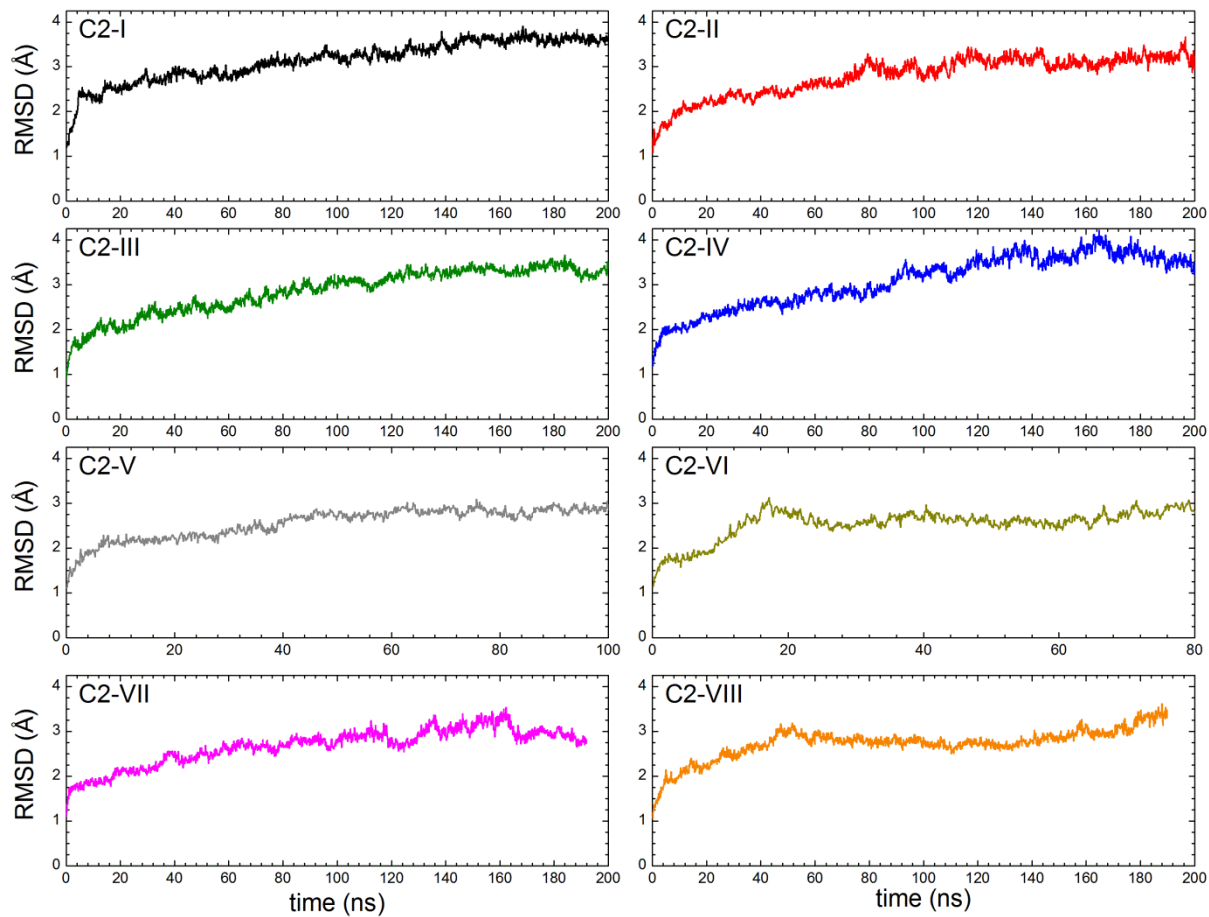

Table S1: Average number of water molecules in the upper region of the H channel in C1 simulations.

| Simulation system | Average number of water molecules* |
|-------------------|------------------------------------|
| C1-I              | $14 \pm 3$                         |
| C1-II             | $11 \pm 1$                         |
| C1-III            | $12 \pm 1$                         |
| C1-IV             | $12 \pm 1$                         |
| C1-V              | $12 \pm 2$                         |
| C1-VI             | $11 \pm 2$                         |

\* Average number of water molecules were calculated over entire simulation trajectories by counting water oxygens within 5 Å of residues 54 371 440 and 441 (highlighted in blue in Fig. 1B).

Table S2: Average number of water molecules in the middle region of the H channel in C1 simulations.

| Simulation system | Average number of water molecules* |
|-------------------|------------------------------------|
| C1-I              | $8 \pm 1$                          |
| C1-II             | $7 \pm 1$                          |
| C1-III            | $7 \pm 1$                          |
| C1-IV             | $9 \pm 1$                          |
| C1-V              | $9 \pm 2$                          |
| C1-VI             | $8 \pm 1$                          |

\* Average number of water molecules were calculated over entire simulation trajectories by counting water oxygens within 5 Å of residues 38 424 454 and 458 (highlighted in cyan in Fig 1B).

Table S3: Average number of water molecules in the lower region of the H channel in C1 simulations.

| Simulation system | Average number of water molecules* |
|-------------------|------------------------------------|
| C1-I              | $3 \pm 1$                          |
| C1-II             | $4 \pm 1$                          |
| C1-III            | $4 \pm 1$                          |
| C1-IV             | $5 \pm 1$                          |
| C1-V              | $4 \pm 1$                          |
| C1-VI             | $9 \pm 1$                          |

\* Average number of water molecules were calculated over entire simulation trajectories by counting water oxygens within 5 Å of residues 461 and 413 (highlighted in green in Fig. 1B).

Table S4: Average number of water molecules in the upper region of the H channel in C2 simulations.

| Simulation system     | Average number of water molecules* |
|-----------------------|------------------------------------|
| C2-I (replica 1/2)    | $29 \pm 6 / 24 \pm 4$              |
| C2-II (replica 1/2)   | $17 \pm 3 / 16 \pm 2$              |
| C2-III                | $22 \pm 5$                         |
| C2-IV                 | $31 \pm 8$                         |
| C2-V                  | $26 \pm 4$                         |
| C2-VI                 | $21 \pm 1$                         |
| C2-VII (replica 1/2)  | $27 \pm 7 / 31 \pm 5$              |
| C2-VIII (replica 1/2) | $25 \pm 6 / 18 \pm 3$              |

\* Average number of water molecules were calculated over entire simulation trajectories by counting water oxygens within 5 Å of residues 54 371 440 and 441 (highlighted in blue in Fig. 1B).

Table S5: Average number of water molecules in the middle region of the H channel in C2 simulations.

| Simulation system     | Average number of water molecules* |
|-----------------------|------------------------------------|
| C2-I (replica 1/2)    | $3 \pm 1 / 3 \pm 1$                |
| C2-II (replica 1/2)   | $3 \pm 1 / 2 \pm 1$                |
| C2-III                | $5 \pm 2$                          |
| C2-IV                 | $4 \pm 1$                          |
| C2-V                  | $5 \pm 3$                          |
| C2-VI                 | $3 \pm 0.3$                        |
| C2-VII (replica 1/2)  | $3 \pm 2 / 3 \pm 1$                |
| C2-VIII (replica 1/2) | $2 \pm 1 / 4 \pm 2$                |

\* Average number of water molecules were calculated over entire simulation trajectories by counting water oxygens within 5 Å of residues 38 424 454 and 458 (highlighted in cyan in Fig. 1B).

Table S6: Average number of water molecules in the lower region of the H channel in C2 simulations.

| Simulation system     | Average number of water molecules* |
|-----------------------|------------------------------------|
| C2-I (replica 1/2)    | $1 \pm 0.5 / 1 \pm 1$              |
| C2-II (replica 1/2)   | $3 \pm 1 / 2 \pm 1$                |
| C2-III                | $2 \pm 1$                          |
| C2-IV                 | $8 \pm 1$                          |
| C2-V                  | $8 \pm 1$                          |
| C2-VI                 | $2 \pm 0.2$                        |
| C2-VII (replica 1/2)  | $3 \pm 1 / 2 \pm 1$                |
| C2-VIII (replica 1/2) | $3 \pm 1 / 2 \pm 1$                |

\* Average number of water molecules were calculated over entire simulation trajectories by counting water oxygens within 5 Å of residues 461 and 413 (highlighted in green in Fig. 1B).
